# Supplementary figures and images for: A Multiplex CRISPR/Cas9 System for Use as an Anti-BmNPV Therapeutic
Source: Preprints.org preprint supplement (doi:10.20944/preprints201811.0159.v1), 2018-11-07

Supplementary Figure 1A

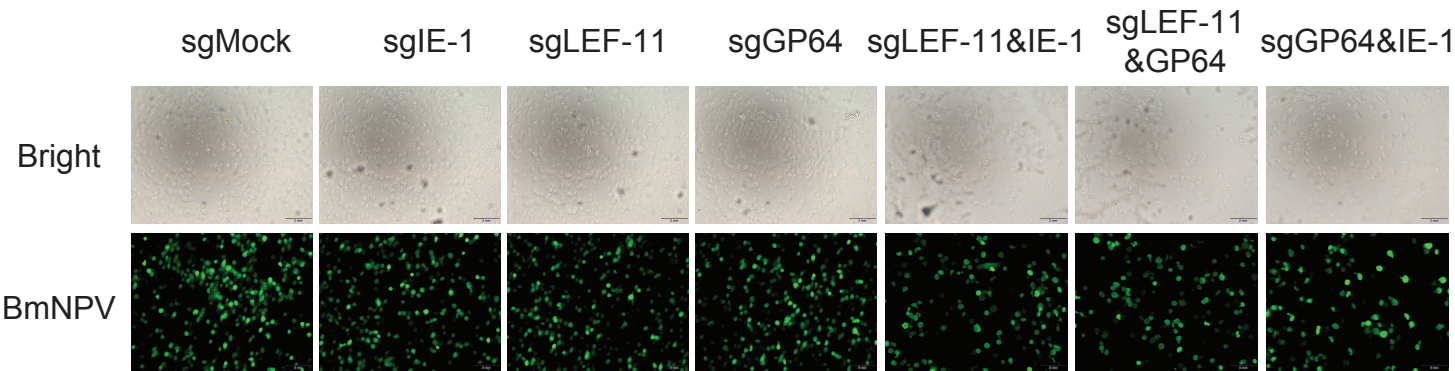

Supplementary Figure 1B

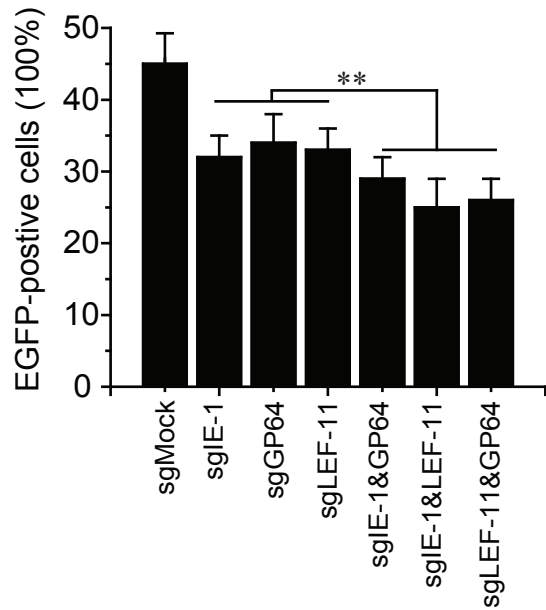

Supplement: Supplementary file 1 [file supplementary]
